# Supplementary material for: Photocatalytic activation of peroxodisulfate using iron-containing MOFs synthesized by single-crystal-to-single-crystal transformation for ofloxacin degradation
Source: Royal Society of Chemistry journal article supplement (doi:10.1039/d3nj03470d), 2023-01-01
Supplement: d3nj03470d1.pdf [file d3nj03470d1.pdf]

## Supporting information

### **Enhanced photocatalytic activation of peroxydisulfate over Fe-containing MOF synthesized by single-crystal-to-single-crystal transformation for ofloxacin degradation**

Hao Zhang,<sup>a</sup> Feng-Yu Chen,<sup>a</sup> Zhi-Yong Liu,<sup>a</sup> Yu-Hui Luo,<sup>a,b,\*</sup> Zi-Lin Zhou,<sup>a</sup> Xue-Meng Jia,<sup>a</sup> Xin Wang,<sup>a</sup> Yun-Qiong Yang<sup>a,\*</sup>

*a School of Environmental and Chemical Engineering, Jiangsu Ocean University, Lianyungang 222000, P. R. China.*

*b Jiangsu Institute of Marine Resources Development, Jiangsu Ocean University, Lianyungang 222000, P. R. China.*

\* Corresponding authors. E-mail: luoyh@jou.edu.cn (Yu-Hui Luo),  
yz9502@163.com (Yun-Qiong Yang)

## Instruments

All samples were characterized by powder X-ray diffraction (PXRD; PANalytical X'pert PRO), Fourier transform infrared spectroscopy (FT-IR, Thermo Scientific equipment Nicolet iS10), scanning electron microscopy (SEM; Oxford JEOL JSM-7900F), thermogravimetric analysis (TGA, Netzsch TG 209 F1 Libra), or X-ray photoelectron spectroscopy (XPS). The Brunauer-Emmett-Teller (BET) surface areas of MOFs were determined using N<sub>2</sub> adsorption/desorption technique (BSD-PM1). Electron Spin Resonance (ESR, Bruker A200) tests were carried out to characterize the active radicals. The photoluminescence spectroscopy (PL, FL-7000 HITCAHI) was tested at room temperature with a Xenon lamp as a light source. Electrochemical and photocurrent data were tested with a CHI660D electrochemical workstation (Shanghai Chenhua Instruments), a 300 W Xenon lamp was used as a light source. Photocatalytic experiments were carried out at an YCYN-GHX-D photochemical reactor (Shanghai Zhimei Instruments). The absorbance of solution was measured by an INESA L8 Plus UV-Vis spectrophotometer.

## X-ray crystallography

Crystallographic diffraction data for In<sub>3</sub>-TCA and Fe<sub>2</sub>In-TCA were recorded on a Bruker D8 diffractometer with graphite monochromatized Mo-K $\alpha$  radiation ( $\lambda = 0.71073 \text{ \AA}$ ) at 240 K. In<sub>3</sub>-TCA and Fe<sub>2</sub>In-TCA were solved by Direct Method of SHELXT-2016 and refined by full-matrix least-squares techniques by using the SHELXL-2018 program [1]. All nonhydrogen atoms were refined with anisotropic temperature parameters. All hydrogen atoms were placed in geometrically idealized position as a riding mode. The solvent molecules and NO<sub>3</sub><sup>-</sup> anions in the crystal are highly disordered and are removed using the SQUEEZE routine of PLATON [2]. NO<sub>3</sub><sup>-</sup> anions were added to the formula of MOF directly for charge balance. The number of solvent molecules cannot be accurately determined at present, so it has not been added to the formula. CCDC number for In<sub>3</sub>-TCA and Fe<sub>2</sub>In-TCA is 2143113 and 2143114, respectively. The crystallographic data for In<sub>3</sub>-TCA and Fe<sub>2</sub>In-TCA were summarized in Table S2, and the selected bond lengths and angles are listed in Table S3 and S4.

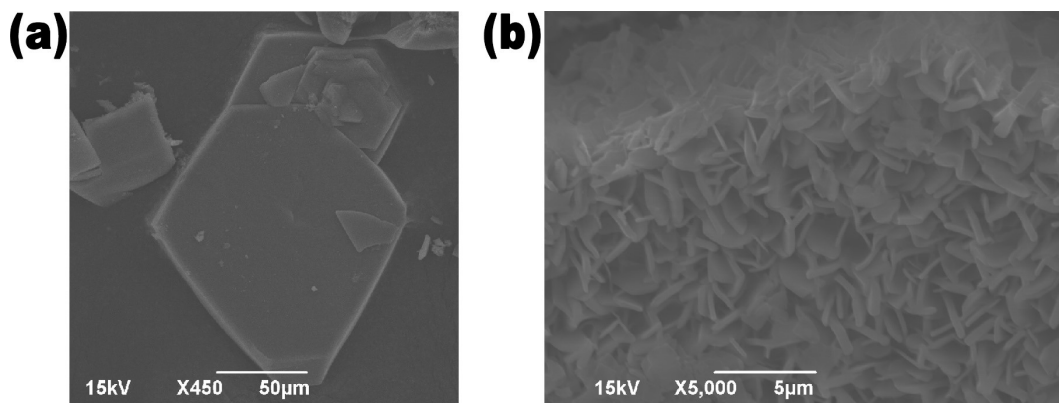

**Fig. S1.** SEM images of In<sub>3</sub>-TCA prepared with the addition of 10 μL/mL (a) and 0 μL/mL (b) of HNO<sub>3</sub>.

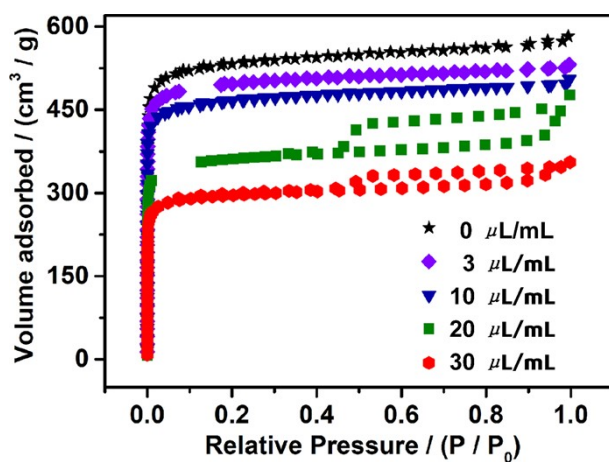

**Fig. S2.** Nitrogen adsorption/desorption isotherms of Fe<sub>2</sub>In-TCA synthesized under different acidity.

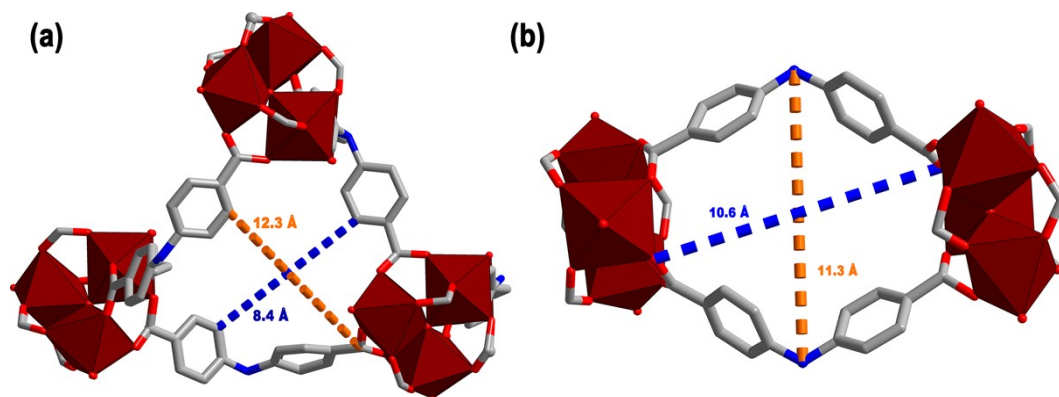

**Fig. S3.** Channel window size of Fe<sub>2</sub>In-TCA.

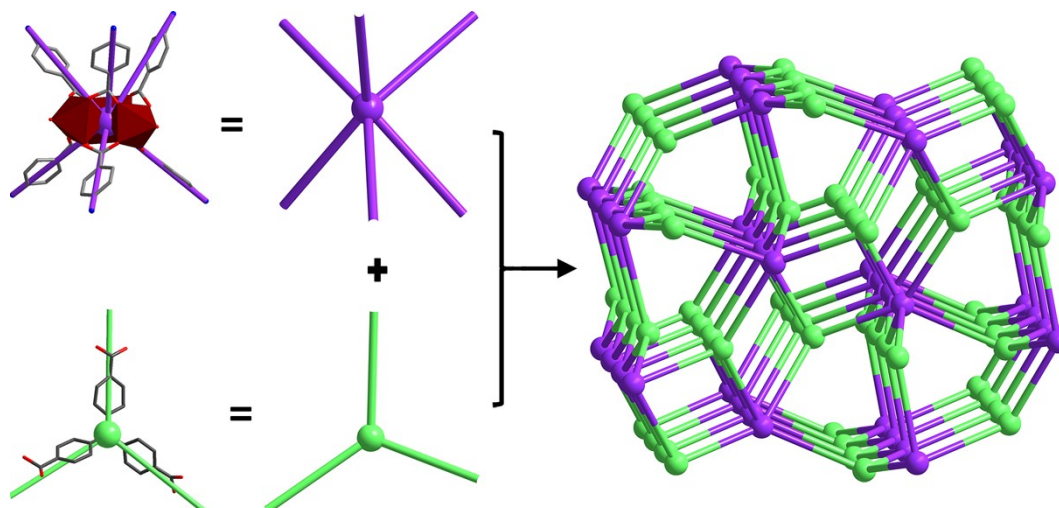

**Fig. S4.** Each trimeric SBU links to six  $\text{TCA}^{3-}$  can be defined as a six-connected node and each  $\text{TCA}^{3-}$  ligand coordinates to three trimeric SBUs can be defined as a three-connected node, then the framework of  $\text{Fe}_2\text{In-TCA}$  can be reduced to a new type of (3,6)-connected network.

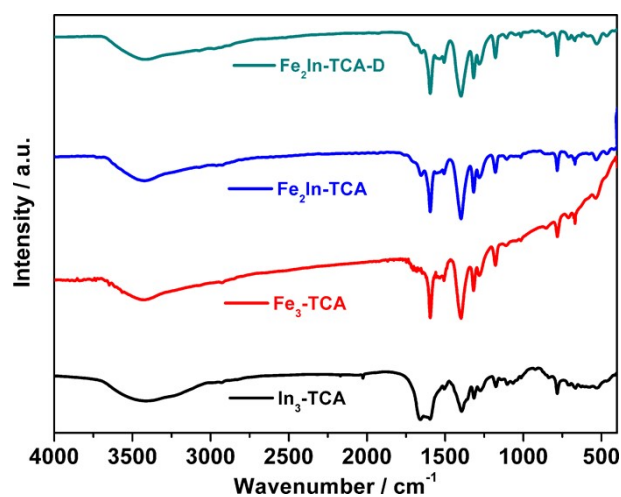

**Fig. S5.** FT-IR spectra of different MOFs.

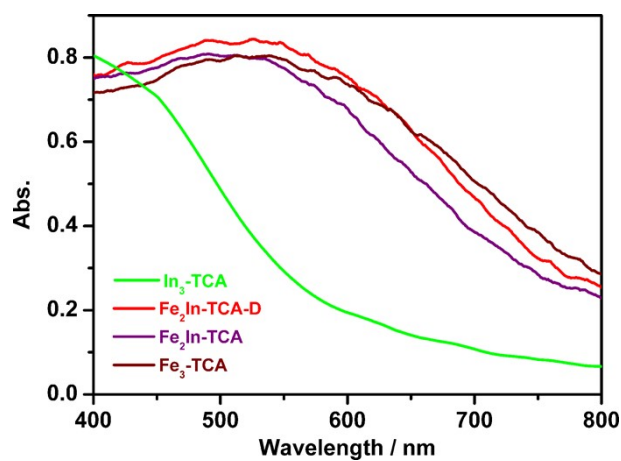

**Fig. S6.** Solid UV-vis absorption spectra of different MOFs.

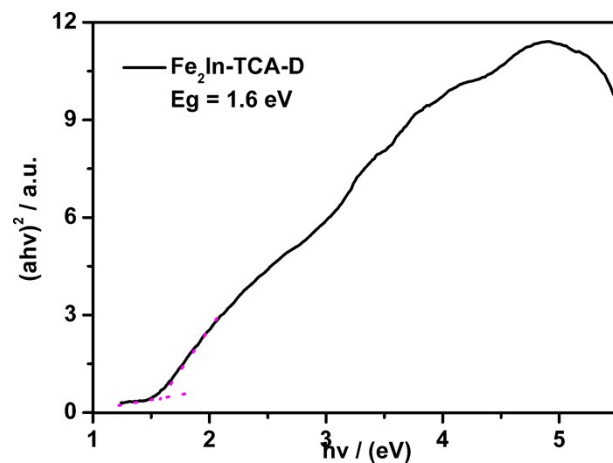

**Fig. S7.** UV-visible diffuse reflection and band gap of  $\text{Fe}_2\text{In-TCA-D}$ .

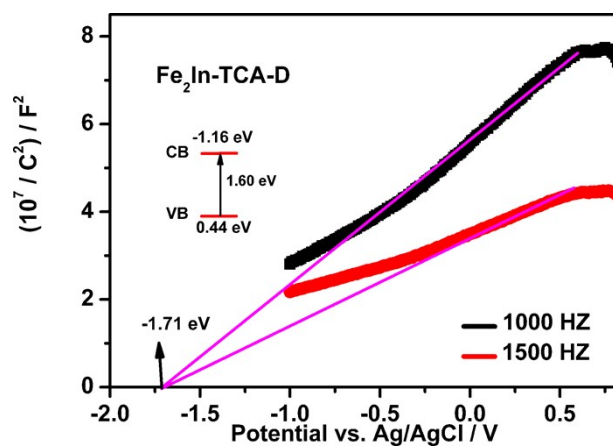

**Fig. S8.** Mott-Schottky plots  $\text{Fe}_2\text{In-TCA-D}$ . Inset: CB/VB potential of  $\text{Fe}_2\text{In-TCA-D}$ .

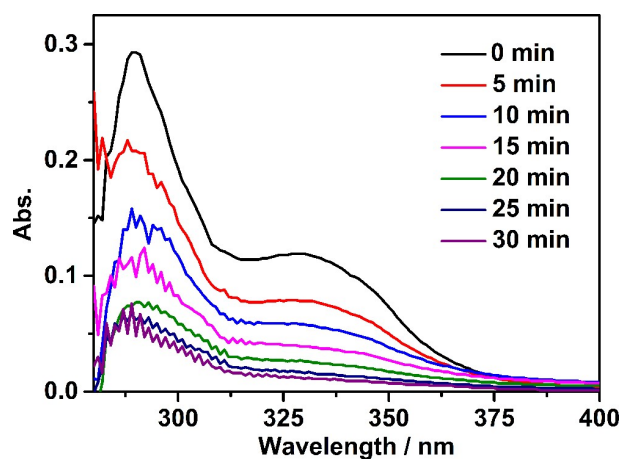

**Fig. S9.** Time-dependent absorption spectra of OFL solution in the presence of  $\text{Fe}_2\text{In-TCA}$ .

**Table S1.** Comparison of OFL degradation efficiency with different photocatalysts.

| Catalysts                                                                            | K (min <sup>-1</sup> ) | Efficiency (%) | Time (min) | Light source      | Peroxide                      | Reference                              |
|--------------------------------------------------------------------------------------|------------------------|----------------|------------|-------------------|-------------------------------|----------------------------------------|
| BaTiO <sub>3</sub> /WS <sub>2</sub>                                                  | 0.173                  | 89%            | 100        | visible light     | PS                            | Commun. Chem., 2022, 5, 95             |
| Bi <sub>2</sub> S <sub>3</sub> /Bi <sub>2</sub> WO <sub>6</sub>                      | 0.0112                 | 87%            | 180        | visible light     | H <sub>2</sub> O <sub>2</sub> | Chem. Eng. J., 2018, 354, 692          |
| BiVO <sub>4</sub> /g-C <sub>3</sub> N <sub>4</sub> /NiFe <sub>2</sub> O <sub>4</sub> | 0.1353                 | 96%            | 60         | visible light     | /                             | Chem. Eng. J., 2021, 405, 126704       |
| Co-MIL-53-NH-BT                                                                      | 0.0392                 | 99.8%          | 140        | visible light     | /                             | J. Hazard. Mater., 2020, 387, 122011   |
| Co-MoS <sub>2</sub>                                                                  | 0.3121                 | 91.1%          | 30         | visible light     | PMS                           | Chem. Eng. J., 2020, 401, 125978       |
| LaNiO <sub>3</sub>                                                                   | 0.061                  | 97%            | 60         | visible light     | PMS                           | Chem. Eng. J., 2019, 359, 828          |
| P <sub>2</sub> -Mn <sub>3</sub> O <sub>4</sub>                                       | 0.667                  | 99.5           | 10         | ultraviolet light | PMS                           | Appl. Catal. B-Environ. 2019, 248, 298 |
| Fe <sub>2</sub> In-TCA                                                               | 0.0815                 | 98%            | 30         | visible light     | PDS                           | <b>This work</b>                       |

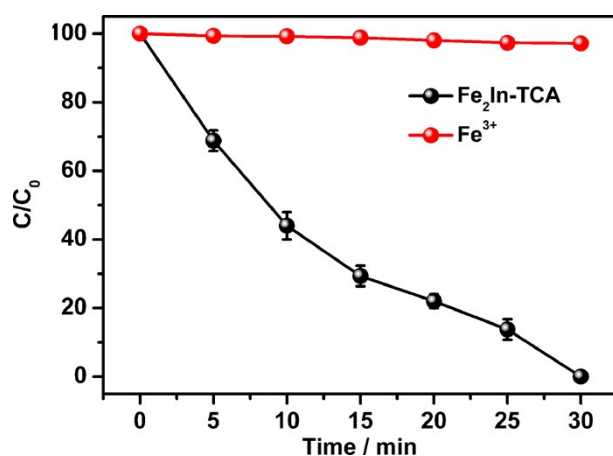**Fig. S10.** Degradation of OFL in the presence of Fe<sub>2</sub>In-TCA or Fe<sup>3+</sup>.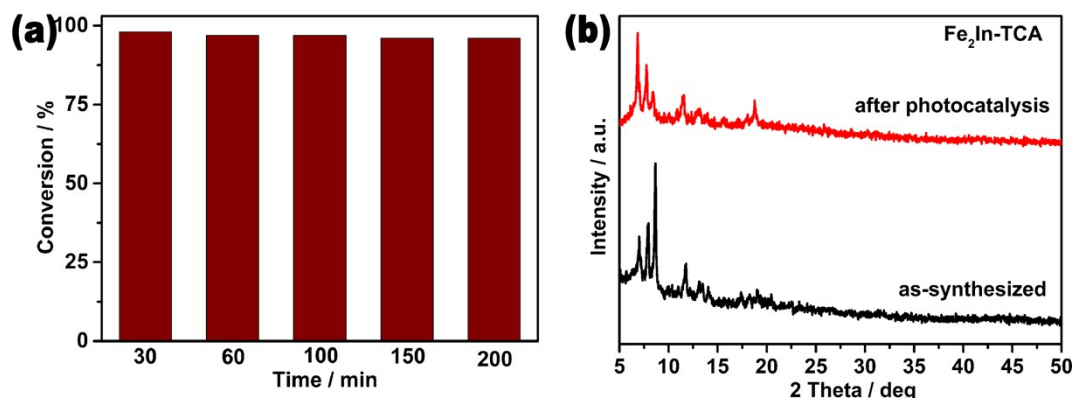**Fig. S11.** (a) The circle experiment for removing OFL by Fe<sub>2</sub>In-TCA. (b) The PXRD spectra of Fe<sub>2</sub>In-TCA before and after photocatalytic reactions.

**Table S2.** Crystallographic data of In<sub>3</sub>-TCA and Fe<sub>2</sub>In-TCA.

| Compounds                                                                                         | In <sub>3</sub> -TCA                                                           | Fe <sub>2</sub> In-TCA                                                                         |
|---------------------------------------------------------------------------------------------------|--------------------------------------------------------------------------------|------------------------------------------------------------------------------------------------|
| Formula <sup>a</sup>                                                                              | C <sub>84</sub> H <sub>60</sub> In <sub>6</sub> N <sub>6</sub> O <sub>38</sub> | C <sub>84</sub> H <sub>60</sub> Fe <sub>4</sub> In <sub>2</sub> N <sub>6</sub> O <sub>38</sub> |
| Formula weight                                                                                    | 2450.3                                                                         | 2214.42                                                                                        |
| Crystal system                                                                                    | orthorhombic                                                                   | orthorhombic                                                                                   |
| Space group                                                                                       | <i>Pca2</i> <sub>1</sub>                                                       | <i>Pca2</i> <sub>1</sub>                                                                       |
| <i>a</i> (Å)                                                                                      | 31.248(4)                                                                      | 31.104(5)                                                                                      |
| <i>b</i> (Å)                                                                                      | 16.2834(18)                                                                    | 16.117(2)                                                                                      |
| <i>c</i> (Å)                                                                                      | 42.122(5)                                                                      | 41.896(7)                                                                                      |
| <i>V</i> (Å <sup>3</sup> )                                                                        | 21433(4)                                                                       | 21003(6)                                                                                       |
| <i>Z</i>                                                                                          | 4                                                                              | 4                                                                                              |
| Density (g cm <sup>-3</sup> )                                                                     | 0.759                                                                          | 0.7                                                                                            |
| $\mu$ / mm <sup>-1</sup>                                                                          | 0.674                                                                          | 0.525                                                                                          |
| <i>F</i> (000)                                                                                    | 4816                                                                           | 4448                                                                                           |
| 2 $\theta$ (°)                                                                                    | 35.04                                                                          | 46.67                                                                                          |
| Reflections collected                                                                             | 71221                                                                          | 90692                                                                                          |
| Data/restraints/parameters                                                                        | 13596/3141/1064                                                                | 29981/3134/992                                                                                 |
| GOF on F <sup>2</sup>                                                                             | 1.01                                                                           | 1.049                                                                                          |
| <i>R</i> <sub>1</sub> , <i>wR</i> <sub>2</sub> [ <i>I</i> > 2 $\sigma$ ( <i>I</i> )] <sup>b</sup> | <i>R</i> <sub>1</sub> = 0.0558, <i>wR</i> <sub>2</sub> = 0.1332                | <i>R</i> <sub>1</sub> = 0.0839, <i>wR</i> <sub>2</sub> = 0.179                                 |

<sup>a</sup> NO<sub>3</sub><sup>-</sup> anions were added to the formula directly for charge balance. The number of solvent molecules cannot be accurately determined at present, so it has not been added to the formula.

$$^b R_1 = \sum ||F_o| - |F_c|| / \sum |F_o|; wR_2 = \sum [w(F_o^2 - F_c^2)^2] / \sum [w(F_o^2)^2]^{1/2}.$$

**Table S3.** Selected bond lengths (Å) and angles (°) for In<sub>3</sub>-TCA.

|                                               |           |                                               |           |
|-----------------------------------------------|-----------|-----------------------------------------------|-----------|
| In <sub>1</sub> -O <sub>1</sub>               | 2.026(15) | In <sub>1</sub> -O <sub>1w</sub>              | 2.047(17) |
| In <sub>1</sub> -O <sub>10</sub>              | 2.148(19) | In <sub>1</sub> -O <sub>25</sub> <sup>1</sup> | 2.173(12) |
| In <sub>1</sub> -O <sub>12</sub> <sup>2</sup> | 2.218(15) | In <sub>1</sub> -O <sub>3</sub>               | 2.232(16) |
| In <sub>2</sub> -O <sub>1</sub>               | 2.092(16) | In <sub>2</sub> -O <sub>24</sub> <sup>3</sup> | 2.177(16) |
| In <sub>2</sub> -O <sub>16</sub>              | 2.186(16) | In <sub>2</sub> -O <sub>2w</sub>              | 2.152(15) |
| In <sub>2</sub> -O <sub>4</sub>               | 2.186(15) | In <sub>2</sub> -O <sub>11</sub> <sup>2</sup> | 2.256(19) |
| In <sub>3</sub> -O <sub>1</sub>               | 1.993(15) | In <sub>3</sub> -O <sub>26</sub> <sup>1</sup> | 1.904(13) |
| In <sub>3</sub> -O <sub>23</sub> <sup>3</sup> | 2.088(17) | In <sub>3</sub> -O <sub>9</sub>               | 2.179(17) |
| In <sub>3</sub> -O <sub>15</sub>              | 2.195(18) | In <sub>3</sub> -O <sub>3w</sub>              | 2.22(2)   |
| In <sub>4</sub> -O <sub>2</sub>               | 2.016(15) | In <sub>4</sub> -O <sub>6</sub> <sup>4</sup>  | 2.106(19) |
| In <sub>4</sub> -O <sub>4w</sub>              | 2.136(15) | In <sub>4</sub> -O <sub>13</sub>              | 2.164(17) |
| In <sub>4</sub> -O <sub>21</sub>              | 2.190(17) | In <sub>4</sub> -O <sub>20</sub> <sup>5</sup> | 2.203(14) |
| In <sub>5</sub> -O <sub>2</sub>               | 1.990(16) | In <sub>5</sub> -O <sub>14</sub>              | 2.108(19) |
| In <sub>5</sub> -O <sub>7</sub>               | 2.182(18) | In <sub>5</sub> -O <sub>5</sub> <sup>4</sup>  | 2.217(15) |
| In <sub>5</sub> -O <sub>5w</sub>              | 2.187(18) | In <sub>5</sub> -O <sub>18</sub> <sup>6</sup> | 2.240(15) |
| In <sub>6</sub> -O <sub>17</sub> <sup>6</sup> | 1.772(18) | In <sub>6</sub> -O <sub>2</sub>               | 2.087(16) |
| In <sub>6</sub> -O <sub>6w</sub>              | 2.150(17) | In <sub>6</sub> -O <sub>19</sub> <sup>5</sup> | 2.159(16) |
| In <sub>6</sub> -O <sub>8</sub>               | 2.179(17) | In <sub>6</sub> -O <sub>22</sub>              | 2.172(18) |

---

|                                      |          |                                        |          |
|--------------------------------------|----------|----------------------------------------|----------|
| $O_1\text{-In}_1\text{-O}_{1w}$      | 178.7(7) | $O_1\text{-In}_1\text{-O}_{10}$        | 89.6(6)  |
| $O_{1w}\text{-In}_1\text{-O}_{10}$   | 91.5(7)  | $O_1\text{-In}_1\text{-O}_{25^1}$      | 90.5(6)  |
| $O_{1w}\text{-In}_1\text{-O}_{25^1}$ | 88.6(6)  | $O_{10}\text{-In}_1\text{-O}_{25^1}$   | 88.6(6)  |
| $O_1\text{-In}_1\text{-O}_{12^2}$    | 93.5(6)  | $O_{1w}\text{-In}_1\text{-O}_{12^2}$   | 85.4(7)  |
| $O_{10}\text{-In}_1\text{-O}_{12^2}$ | 176.8(6) | $O_{25^1}\text{-In}_1\text{-O}_{12^2}$ | 90.6(6)  |
| $O_{1w}\text{-In}_1\text{-O}_3$      | 84.6(7)  | $O_{10}\text{-In}_1\text{-O}_3$        | 87.3(6)  |
| $O_{25^1}\text{-In}_1\text{-O}_3$    | 172.0(6) | $O_{12^2}\text{-In}_1\text{-O}_3$      | 93.2(7)  |
| $O_1\text{-In}_2\text{-O}_{24^3}$    | 98.3(6)  | $O_1\text{-In}_2\text{-O}_{16}$        | 90.0(6)  |
| $O_{24^3}\text{-In}_2\text{-O}_{16}$ | 91.8(7)  | $O_1\text{-In}_2\text{-O}_{2w}$        | 177.4(6) |
| $O_{24^3}\text{-In}_2\text{-O}_{2w}$ | 84.2(6)  | $O_{16}\text{-In}_2\text{-O}_{2w}$     | 89.0(7)  |
| $O_1\text{-In}_2\text{-O}_4$         | 96.4(6)  | $O_{24^3}\text{-In}_2\text{-O}_4$      | 88.3(7)  |
| $O_{16}\text{-In}_2\text{-O}_4$      | 173.5(7) | $O_{2w}\text{-In}_2\text{-O}_4$        | 84.5(7)  |
| $O_1\text{-In}_2\text{-O}_{11^2}$    | 91.9(7)  | $O_{24^3}\text{-In}_2\text{-O}_{11^2}$ | 169.8(7) |
| $O_{16}\text{-In}_2\text{-O}_{11^2}$ | 89.2(7)  | $O_{2w}\text{-In}_2\text{-O}_{11^2}$   | 85.7(7)  |
| $O_4\text{-In}_2\text{-O}_{11^2}$    | 89.6(7)  | $O_1\text{-In}_3\text{-O}_{26^1}$      | 90.2(6)  |
| $O_1\text{-In}_3\text{-O}_{23^3}$    | 94.4(6)  | $O_{26^1}\text{-In}_3\text{-O}_{23^3}$ | 173.8(6) |
| $O_1\text{-In}_3\text{-O}_9$         | 92.5(6)  | $O_{26^1}\text{-In}_3\text{-O}_9$      | 90.0(7)  |
| $O_{23^3}\text{-In}_3\text{-O}_9$    | 85.7(7)  | $O_1\text{-In}_3\text{-O}_{15}$        | 94.0(6)  |
| $O_{26^1}\text{-In}_3\text{-O}_{15}$ | 90.3(7)  | $O_{23^3}\text{-In}_3\text{-O}_{15}$   | 93.5(7)  |
| $O_9\text{-In}_3\text{-O}_{15}$      | 173.5(7) | $O_1\text{-In}_3\text{-O}_{3w}$        | 176.1(7) |
| $O_{26^1}\text{-In}_3\text{-O}_{3w}$ | 86.0(7)  | $O_{23^3}\text{-In}_3\text{-O}_{3w}$   | 89.4(7)  |
| $O_9\text{-In}_3\text{-O}_{3w}$      | 86.9(7)  | $O_{15}\text{-In}_3\text{-O}_{3w}$     | 86.7(8)  |
| $O_2\text{-In}_4\text{-O}_6^4$       | 89.5(7)  | $O_2\text{-In}_4\text{-O}_{4w}$        | 176.9(7) |
| $O_6^4\text{-In}_4\text{-O}_{4w}$    | 88.3(7)  | $O_2\text{-In}_4\text{-O}_{13}$        | 93.2(7)  |
| $O_6^4\text{-In}_4\text{-O}_{13}$    | 85.6(7)  | $O_{4w}\text{-In}_4\text{-O}_{13}$     | 88.7(6)  |
| $O_2\text{-In}_4\text{-O}_{21}$      | 93.0(7)  | $O_6^4\text{-In}_4\text{-O}_{21}$      | 91.7(7)  |
| $O_{4w}\text{-In}_4\text{-O}_{21}$   | 85.0(6)  | $O_{13}\text{-In}_4\text{-O}_{21}$     | 173.3(7) |
| $O_2\text{-In}_4\text{-O}_{20^5}$    | 94.8(6)  | $O_6^4\text{-In}_4\text{-O}_{20^5}$    | 174.1(7) |
| $O_{4w}\text{-In}_4\text{-O}_{20^5}$ | 87.6(6)  | $O_{13}\text{-In}_4\text{-O}_{20^5}$   | 90.1(6)  |
| $O_{21}\text{-In}_4\text{-O}_{20^5}$ | 92.1(6)  | $O_2\text{-In}_5\text{-O}_{14}$        | 90.9(7)  |
| $O_2\text{-In}_5\text{-O}_7$         | 94.6(7)  | $O_{14}\text{-In}_5\text{-O}_7$        | 84.8(7)  |
| $O_2\text{-In}_5\text{-O}_5^4$       | 95.1(6)  | $O_{14}\text{-In}_5\text{-O}_5^4$      | 89.2(7)  |
| $O_7\text{-In}_5\text{-O}_5^4$       | 168.7(7) | $O_2\text{-In}_5\text{-O}_{5w}$        | 175.6(7) |
| $O_{14}\text{-In}_5\text{-O}_{5w}$   | 87.0(7)  | $O_7\text{-In}_5\text{-O}_{5w}$        | 81.4(7)  |
| $O_5^4\text{-In}_5\text{-O}_{5w}$    | 88.7(7)  | $O_2\text{-In}_5\text{-O}_{18^6}$      | 98.1(6)  |
| $O_{14}\text{-In}_5\text{-O}_{18^6}$ | 170.9(6) | $O_7\text{-In}_5\text{-O}_{18^6}$      | 93.1(6)  |
| $O_5^4\text{-In}_5\text{-O}_{18^6}$  | 91.3(6)  | $O_{5w}\text{-In}_5\text{-O}_{18^6}$   | 83.9(6)  |
| $O_{17^6}\text{-In}_6\text{-O}_2$    | 95.1(7)  | $O_{17^6}\text{-In}_6\text{-O}_{6w}$   | 86.4(7)  |
| $O_2\text{-In}_6\text{-O}_{6w}$      | 177.5(7) | $O_{17^6}\text{-In}_6\text{-O}_{19^5}$ | 171.5(7) |
| $O_2\text{-In}_6\text{-O}_{19^5}$    | 93.3(6)  | $O_{6w}\text{-In}_6\text{-O}_{19^5}$   | 85.3(6)  |
| $O_{17^6}\text{-In}_6\text{-O}_8$    | 96.1(7)  | $O_2\text{-In}_6\text{-O}_8$           | 89.3(6)  |
| $O_{6w}\text{-In}_6\text{-O}_8$      | 88.6(7)  | $O_{19^5}\text{-In}_6\text{-O}_8$      | 85.4(6)  |
| $O_{17^6}\text{-In}_6\text{-O}_{22}$ | 86.2(7)  | $O_2\text{-In}_6\text{-O}_{22}$        | 91.7(7)  |
| $O_{6w}\text{-In}_6\text{-O}_{22}$   | 90.4(7)  | $O_{19^5}\text{-In}_6\text{-O}_{22}$   | 92.2(6)  |

---



|                   |          |
|-------------------|----------|
| $O_8-In_6-O_{22}$ | 177.4(6) |
|-------------------|----------|

Symmetry transformations: <sup>1</sup> 1/2 - X, -1 + Y, 1/2 + Z; <sup>2</sup> -1/2 + X, -Y, +Z; <sup>3</sup> 1/2 - X, +Y, 1/2 + Z; <sup>4</sup> 1/2 + X, 1 - Y, +Z; <sup>5</sup> -X, -Y, -1/2 + Z; <sup>6</sup> -X, 1 - Y, -1/2 + Z.

**Table S4.** Selected bond lengths (Å) and angles (°) for Fe<sub>2</sub>In-TCA.

|                                                                             |           |                                                                             |           |
|-----------------------------------------------------------------------------|-----------|-----------------------------------------------------------------------------|-----------|
| Fe <sub>1</sub> -O <sub>1</sub>                                             | 1.947(14) | Fe <sub>1</sub> -O <sub>12</sub>                                            | 2.044(15) |
| Fe <sub>1</sub> -O <sub>14</sub> <sup>1</sup>                               | 2.163(13) | Fe <sub>1</sub> -O <sub>24</sub> <sup>2</sup>                               | 2.166(11) |
| Fe <sub>1</sub> -O <sub>5</sub>                                             | 2.143(14) | Fe <sub>1</sub> -O <sub>1w</sub>                                            | 2.216(13) |
| Fe <sub>2</sub> -O <sub>23</sub> <sup>2</sup>                               | 1.811(12) | Fe <sub>2</sub> -O <sub>26</sub> <sup>3</sup>                               | 2.087(11) |
| Fe <sub>2</sub> -O <sub>1</sub>                                             | 2.052(14) | Fe <sub>2</sub> -O <sub>11</sub>                                            | 2.150(14) |
| Fe <sub>2</sub> -O <sub>15</sub>                                            | 2.113(16) | Fe <sub>2</sub> -O <sub>2w</sub>                                            | 2.340(15) |
| In <sub>3</sub> -O <sub>1</sub>                                             | 2.097(13) | In <sub>3</sub> -O <sub>6</sub>                                             | 2.138(13) |
| In <sub>3</sub> -O <sub>25</sub> <sup>3</sup>                               | 2.161(12) | In <sub>3</sub> -O <sub>13</sub> <sup>1</sup>                               | 2.134(15) |
| In <sub>3</sub> -O <sub>16</sub>                                            | 2.197(15) | In <sub>3</sub> -O <sub>3w</sub>                                            | 2.177(13) |
| Fe <sub>4</sub> -O <sub>2</sub>                                             | 2.017(13) | Fe <sub>4</sub> -O <sub>21</sub>                                            | 2.069(14) |
| Fe <sub>4</sub> -O <sub>8</sub> <sup>1</sup>                                | 2.099(14) | Fe <sub>4</sub> -O <sub>18</sub> <sup>5</sup>                               | 2.118(13) |
| Fe <sub>4</sub> -O <sub>9</sub>                                             | 2.117(12) | Fe <sub>4</sub> -O <sub>4w</sub>                                            | 2.274(13) |
| Fe <sub>5</sub> -O <sub>2</sub>                                             | 2.050(14) | Fe <sub>5</sub> -O <sub>22</sub>                                            | 2.048(15) |
| Fe <sub>5</sub> -O <sub>20</sub> <sup>6</sup>                               | 1.971(13) | Fe <sub>5</sub> -O <sub>17</sub> <sup>5</sup>                               | 2.091(14) |
| Fe <sub>5</sub> -O <sub>4</sub>                                             | 2.129(13) | Fe <sub>5</sub> -O <sub>5w</sub>                                            | 2.186(14) |
| In <sub>6</sub> -O <sub>10</sub>                                            | 2.000(13) | In <sub>6</sub> -O <sub>2</sub>                                             | 2.010(14) |
| In <sub>6</sub> -O <sub>19</sub> <sup>6</sup>                               | 2.162(13) | In <sub>6</sub> -O <sub>7</sub> <sup>4</sup>                                | 2.176(12) |
| In <sub>6</sub> -O <sub>3</sub>                                             | 2.240(16) | In <sub>6</sub> -O <sub>6w</sub>                                            | 2.308(14) |
| O <sub>1</sub> -Fe <sub>1</sub> -O <sub>12</sub>                            | 88.6(6)   | O <sub>1</sub> -Fe <sub>1</sub> -O <sub>14</sub> <sup>1</sup>               | 92.1(5)   |
| O <sub>12</sub> <sup>1</sup> -Fe <sub>1</sub> -O <sub>14</sub> <sup>1</sup> | 176.5(6)  | O <sub>1</sub> -Fe <sub>1</sub> -O <sub>24</sub> <sup>2</sup>               | 93.4(5)   |
| O <sub>12</sub> <sup>1</sup> -Fe <sub>1</sub> -O <sub>24</sub> <sup>2</sup> | 89.9(5)   | O <sub>14</sub> <sup>1</sup> -Fe <sub>1</sub> -O <sub>24</sub> <sup>2</sup> | 86.6(6)   |
| O <sub>1</sub> -Fe <sub>1</sub> -O <sub>5</sub>                             | 94.4(6)   | O <sub>12</sub> -Fe <sub>1</sub> -O <sub>5</sub>                            | 88.2(5)   |
| O <sub>14</sub> <sup>1</sup> -Fe <sub>1</sub> -O <sub>5</sub>               | 95.2(6)   | O <sub>24</sub> <sup>2</sup> -Fe <sub>1</sub> -O <sub>5</sub>               | 171.9(6)  |
| O <sub>1</sub> -Fe <sub>1</sub> -O <sub>1w</sub>                            | 178.6(5)  | O <sub>12</sub> -Fe <sub>1</sub> -O <sub>1w</sub>                           | 91.6(5)   |
| O <sub>14</sub> <sup>1</sup> -Fe <sub>1</sub> -O <sub>1w</sub>              | 87.6(5)   | O <sub>24</sub> <sup>2</sup> -Fe <sub>1</sub> -O <sub>1w</sub>              | 85.2(5)   |
| O <sub>5</sub> -Fe <sub>1</sub> -O <sub>1w</sub>                            | 87.0(5)   | O <sub>23</sub> <sup>2</sup> -Fe <sub>2</sub> -O <sub>26</sub> <sup>3</sup> | 175.3(6)  |
| O <sub>23</sub> <sup>2</sup> -Fe <sub>2</sub> -O <sub>1</sub>               | 88.0(6)   | O <sub>26</sub> <sup>3</sup> -Fe <sub>2</sub> -O <sub>1</sub>               | 92.7(5)   |
| O <sub>23</sub> <sup>2</sup> -Fe <sub>2</sub> -O <sub>11</sub>              | 90.7(6)   | O <sub>26</sub> <sup>3</sup> -Fe <sub>2</sub> -O <sub>11</sub>              | 84.7(6)   |
| O <sub>1</sub> -Fe <sub>2</sub> -O <sub>11</sub>                            | 88.1(5)   | O <sub>23</sub> <sup>2</sup> -Fe <sub>2</sub> -O <sub>15</sub>              | 88.0(6)   |
| O <sub>26</sub> <sup>3</sup> -Fe <sub>2</sub> -O <sub>15</sub>              | 96.6(6)   | O <sub>1</sub> -Fe <sub>2</sub> -O <sub>15</sub>                            | 93.6(6)   |
| O <sub>11</sub> -Fe <sub>2</sub> -O <sub>15</sub>                           | 177.8(6)  | O <sub>23</sub> <sup>2</sup> -Fe <sub>2</sub> -O <sub>2w</sub>              | 87.7(6)   |
| O <sub>26</sub> <sup>3</sup> -In <sub>2</sub> -O <sub>2w</sub>              | 91.3(5)   | O <sub>1</sub> -Fe <sub>2</sub> -O <sub>2w</sub>                            | 174.4(5)  |
| O <sub>11</sub> -Fe <sub>2</sub> -O <sub>2w</sub>                           | 88.3(5)   | O <sub>15</sub> -Fe <sub>2</sub> -O <sub>2w</sub>                           | 89.9(6)   |
| O <sub>1</sub> -In <sub>3</sub> -O <sub>6</sub>                             | 92.9(5)   | O <sub>1</sub> -In <sub>3</sub> -O <sub>25</sub> <sup>3</sup>               | 98.3(5)   |
| O <sub>6</sub> -In <sub>3</sub> -O <sub>25</sub> <sup>3</sup>               | 87.3(6)   | O <sub>1</sub> -In <sub>3</sub> -O <sub>13</sub> <sup>1</sup>               | 91.3(5)   |
| O <sub>6</sub> -In <sub>3</sub> -O <sub>13</sub> <sup>1</sup>               | 88.4(6)   | O <sub>25</sub> <sup>3</sup> -In <sub>3</sub> -O <sub>13</sub> <sup>1</sup> | 169.7(5)  |
| O <sub>1</sub> -In <sub>3</sub> -O <sub>16</sub>                            | 92.0(6)   | O <sub>6</sub> -In <sub>3</sub> -O <sub>16</sub>                            | 174.7(6)  |
| O <sub>25</sub> <sup>3</sup> -In <sub>3</sub> -O <sub>16</sub>              | 90.1(6)   | O <sub>13</sub> <sup>1</sup> -In <sub>3</sub> -O <sub>16</sub>              | 93.3(6)   |
| O <sub>1</sub> -In <sub>3</sub> -O <sub>3w</sub>                            | 174.9(5)  | O <sub>6</sub> -In <sub>3</sub> -O <sub>3w</sub>                            | 85.1(5)   |

|                                                                            |          |                                                                             |          |
|----------------------------------------------------------------------------|----------|-----------------------------------------------------------------------------|----------|
| O <sub>25</sub> <sup>3</sup> -In <sub>3</sub> -O <sub>3w</sub>             | 86.3(5)  | O <sub>13</sub> <sup>1</sup> -In <sub>3</sub> -O <sub>3w</sub>              | 84.0(5)  |
| O <sub>16</sub> <sup>3</sup> -In <sub>3</sub> -O <sub>3w</sub>             | 90.1(5)  | O <sub>2</sub> -Fe <sub>4</sub> -O <sub>21</sub>                            | 94.4(6)  |
| O <sub>2</sub> -In <sub>4</sub> -O <sub>8</sub> <sup>4</sup>               | 89.7(6)  | O <sub>21</sub> -In <sub>4</sub> -O <sub>8</sub> <sup>4</sup>               | 87.0(6)  |
| O <sub>2</sub> -In <sub>4</sub> -O <sub>18</sub> <sup>5</sup>              | 93.8(6)  | O <sub>21</sub> -In <sub>4</sub> -O <sub>18</sub> <sup>5</sup>              | 95.6(6)  |
| O <sub>8</sub> -In <sub>4</sub> -O <sub>18</sub> <sup>5</sup>              | 175.5(6) | O <sub>2</sub> -In <sub>4</sub> -O <sub>9</sub>                             | 91.6(5)  |
| O <sub>21</sub> -In <sub>4</sub> -O <sub>9</sub>                           | 171.3(6) | O <sub>8</sub> <sup>4</sup> -In <sub>4</sub> -O <sub>9</sub>                | 86.9(6)  |
| O <sub>18</sub> <sup>5</sup> -In <sub>4</sub> -O <sub>9</sub>              | 94.8(6)  | O <sub>2</sub> -In <sub>4</sub> -O <sub>4w</sub>                            | 178.1(5) |
| O <sub>21</sub> -In <sub>4</sub> -O <sub>4w</sub>                          | 84.3(5)  | O <sub>8</sub> <sup>4</sup> -In <sub>4</sub> -O <sub>4w</sub>               | 88.8(6)  |
| O <sub>18</sub> <sup>5</sup> -In <sub>4</sub> -O <sub>4w</sub>             | 87.8(5)  | O <sub>9</sub> -In <sub>4</sub> -O <sub>4w</sub>                            | 89.4(5)  |
| O <sub>2</sub> -Fe <sub>5</sub> -O <sub>22</sub>                           | 95.5(6)  | O <sub>2</sub> -Fe <sub>5</sub> -O <sub>20</sub> <sup>6</sup>               | 98.0(6)  |
| O <sub>22</sub> -Fe <sub>5</sub> -O <sub>20</sub> <sup>6</sup>             | 86.7(6)  | O <sub>2</sub> -Fe <sub>5</sub> -O <sub>17</sub> <sup>5</sup>               | 94.2(5)  |
| O <sub>22</sub> -Fe <sub>5</sub> -O <sub>17</sub> <sup>5</sup>             | 93.1(6)  | O <sub>20</sub> <sup>6</sup> -Fe <sub>5</sub> -O <sub>17</sub> <sup>5</sup> | 167.8(5) |
| O <sub>2</sub> -Fe <sub>5</sub> -O <sub>4</sub>                            | 88.8(5)  | O <sub>22</sub> -Fe <sub>5</sub> -O <sub>4</sub>                            | 175.0(6) |
| O <sub>20</sub> <sup>6</sup> -Fe <sub>5</sub> -O <sub>4</sub>              | 95.2(6)  | O <sub>17</sub> <sup>5</sup> -Fe <sub>5</sub> -O <sub>4</sub>               | 84.1(6)  |
| O <sub>2</sub> -Fe <sub>5</sub> -O <sub>5w</sub>                           | 178.8(5) | O <sub>22</sub> -Fe <sub>5</sub> -O <sub>5w</sub>                           | 85.5(6)  |
| O <sub>20</sub> <sup>6</sup> -Fe <sub>5</sub> -O <sub>5w</sub>             | 82.6(5)  | O <sub>17</sub> <sup>5</sup> -Fe <sub>5</sub> -O <sub>5w</sub>              | 83.9(6)  |
| O <sub>4</sub> -Fe <sub>5</sub> -O <sub>5w</sub>                           | 90.1(5)  | O <sub>10</sub> -In <sub>6</sub> -O <sub>2</sub>                            | 85.0(6)  |
| O <sub>10</sub> -In <sub>6</sub> -O <sub>19</sub> <sup>6</sup>             | 171.8(6) | O <sub>2</sub> -In <sub>6</sub> -O <sub>19</sub> <sup>6</sup>               | 99.1(5)  |
| O <sub>10</sub> -In <sub>6</sub> -O <sub>7</sub> <sup>4</sup>              | 97.3(6)  | O <sub>2</sub> -In <sub>6</sub> -O <sub>7</sub> <sup>4</sup>                | 95.5(5)  |
| O <sub>19</sub> <sup>6</sup> -In <sub>6</sub> -O <sub>7</sub> <sup>4</sup> | 89.4(6)  | O <sub>10</sub> -In <sub>6</sub> -O <sub>3</sub>                            | 79.6(5)  |
| O <sub>2</sub> -In <sub>6</sub> -O <sub>3</sub>                            | 93.4(5)  | O <sub>19</sub> <sup>6</sup> -In <sub>6</sub> -O <sub>3</sub>               | 93.0(5)  |
| O <sub>7</sub> <sup>4</sup> -In <sub>6</sub> -O <sub>3</sub>               | 170.3(6) | O <sub>10</sub> -In <sub>6</sub> -O <sub>6w</sub>                           | 91.5(5)  |
| O <sub>2</sub> -In <sub>6</sub> -O <sub>6w</sub>                           | 175.2(5) | O <sub>19</sub> <sup>6</sup> -In <sub>6</sub> -O <sub>6w</sub>              | 84.0(5)  |
| O <sub>74</sub> -In <sub>6</sub> -O <sub>6w</sub>                          | 88.1(5)  | O <sub>3</sub> -In <sub>6</sub> -O <sub>6w</sub>                            | 82.8(5)  |

Symmetry transformations: <sup>1</sup> 1/2 - X, -1 + Y, 1/2 + Z; <sup>2</sup> -1/2 + X, -Y, +Z; <sup>3</sup> 1/2 - X, +Y, 1/2 + Z; <sup>4</sup> 1/2 + X, 1 - Y, +Z; <sup>5</sup> -X, -Y, -1/2 + Z; <sup>6</sup> -X, 1 - Y, -1/2 + Z.

## Reference

1. G.M. Sheldrick. Crystal structure refinement with SHELXL. *Acta Crystallogr. C.* 2015, 71, 3-8.
2. A.L. Spek. Single-crystal structure validation with the program PLATON. *J. Appl. Cryst.*, 2013, 3, 7-13.
